1           **PUBLIC HOSPITALS PREPAREDNESS IN THE PROVISION OF BREAST AND**  
2           **CERVICAL CANCER SERVICES IN BUSIA AND TRANS-NZOIA COUNTIES IN**  
3                                   **KENYA.**

4  
5 Grace W. Mwaura<sup>1,2\*</sup> Obed K. Limo<sup>1</sup>, Gerald O. Lwande<sup>1</sup>, Kenneth Too <sup>1</sup>, Richard Mugo<sup>1</sup>, Ann  
6 W. Mwangi<sup>1,2</sup>, Nicholas Kirui <sup>1,2,4</sup>, Philip Tonui<sup>1,2</sup>, Peter Itsura<sup>1,2</sup>, Jemimah Kamano<sup>1,2,4</sup>

- 7  
8           1. Academic Model Providing Access to Healthcare (AMPATH), Eldoret-Kenya.  
9           2. Moi University School of Medicine, Eldoret-Kenya.  
10           3. Moi Teaching and Referral Hospital, Eldoret-Kenya.  
11           4. Ministry of Health, Division of Non-Communicable Diseases - Kenya

12  
13 **Funding:** This study was funded by Access Accelerated and World Bank (Grant Number: 0356).  
14

15 \*           **Corresponding author:**

16           Grace Wandia Mwaura

17           Academic Model Providing Access to Healthcare

18           P.O. Box 4606-30100; Eldoret-Kenya.

19           Tel: +254722960519

20           E-mail: [wandiahgrace@gmail.com](mailto:wandiahgrace@gmail.com)

21  
22 **Running head:** *Facilities preparedness to provide cervical and breast cancer services.*  
23

25 **Purpose:** To assess the preparedness of public health care facilities in the provision of breast and  
26 cervical cancer services. Specifically, healthcare provider's knowledge on risk factors, screening,  
27 symptoms, diagnosis and treatment as well as availability of medical equipment required for  
28 breast and cervical cancer management.

29 **Methods:** A cross-sectional service provision assessment (SPA) survey conducted in Busia and  
30 Trans-Nzoia counties of Western Kenya between October and December 2018. Interviewer  
31 assisted questionnaires were used to collect data from healthcare workers while a structured  
32 facility questionnaire was used to assess the level of preparedness of the selected public  
33 healthcare facilities stratified by their level of care. Statistical analysis was done using STATA  
34 version 15.

35 **Results:** We enrolled 73 healthcare workers 37 (50.6%) of whom were nurses, followed by  
36 clinical officers and medical officers. The highest proportion of knowledge on risk factors and  
37 screening of breast and cervical cancer was reported among medical officers or consultant  
38 physicians, followed by clinical officers. Nurses scored highly on the symptoms of breast and  
39 cervical cancer. The medical equipment required for breast and cervical cancer screening and  
40 diagnosis were found in most facilities; however, there were no core-biopsy needles or  
41 mammograms found. A single LEEP equipment was found in a health center within Trans Nzoia  
42 while two LEEP equipment were stationed at the Busia county hospital.

43 **Conclusion:** A below average level of knowledge on breast and cervical cancer among the  
44 healthcare workers attending to patients in public healthcare facilities was found in both Busia  
45 and Trans Nzoia counties. Furthermore, there was a disparity in the distribution and quantity of  
46 priority medical equipment for the screening, diagnosis and treatment of breast and cervical  
47 cancer in the two county hospitals.

48 **Keywords:** *Cervical Cancer, Breast Cancer, Preparedness, Service Provision Assessment*  
49 *(SPA), Public Healthcare Facilities, Western Kenya, Busia, Trans Nzoia.*

50

## Introduction

51 Cancer is a major cause of morbidity and mortality across the globe. According to the  
52 International Agency for Research on Cancer global cancer observatory report (1),  
53 approximately 1 in 5 people develop cancer during their lifetime. Of these, 1 in 8 men and 1 in  
54 11 women die from the disease. With a rising proportion of the ageing populations globally,  
55 coupled with other socio-economic risk factors, the prevalence of cancer is on the rise. The most  
56 common forms of cancer among women globally are breast, colorectal, lung, cervical, and  
57 thyroid cancers (2). The likelihood of breast cancer is 1 in 4 cancers diagnosed among women  
58 globally (1,2). In Africa the incidence for breast cancer in 2020 was estimated at 16.8% followed  
59 by cervical cancer at 10.6% (3). In Kenya, the incidence of breast cancer in 2020 was estimated  
60 at 16.1% followed by second placed cervical cancer at 12.4% of all women diagnosed with  
61 cancer (2). With a greater transition to a more modernized lifestyle in Kenya and many other  
62 sub-Saharan African countries, the incidence of breast and cervical cancer have been steadily  
63 rising (4). These low- and medium-income countries (LMIC) have been shown to have a great  
64 burden of various forms of cancer despite advancements in screening, diagnosis and  
65 management options (5). To adequately address the disease burden attributed to these two  
66 cancers, there is need to have effective and adequately prepared health service delivery systems.  
67 The level of preparedness and effectiveness of these health systems can be assessed using  
68 multiple dimensions to assess the progress in addressing the disease burden. Although various  
69 tools could be used in this assessment, a Service Provision Assessment (SPA) survey could be  
70 used to provide a comprehensive understanding of the health service delivery system in a  
71 particular country (6). This is because they support the strengthening of health systems in  
72 developing countries by collecting information on the availability of different resources based in

73 the health facilities within a country. The SPA survey describes the facility-types with the ability  
74 to offer specific health services. It also describes the infrastructural and human resource  
75 preparedness to offer the said services in the health charters (6). Furthermore, it assesses  
76 adherence to the set quality standards for healthcare service provision and whether the clients  
77 and service providers are content with the service delivery environment.

78 The World Health Organization's Global action plan for the prevention and control of  
79 noncommunicable diseases between 2013-2020 targeted a 25% reduction in risk of premature  
80 death attributed to non-communicable diseases including cancer (7). Furthermore, the United  
81 Nations Agenda for Sustainable Development recommends a one-third reduction in the  
82 proportion of premature death associated with non-communicable diseases such as cancer by the  
83 year 2030 using multiple approaches such as prevention, treatment and promotion of mental  
84 health and well-being (8). The public and private health care service delivery institutions should  
85 have an 80% availability of the affordable basic technologies and essential medicines for the  
86 management of these noncommunicable diseases. Furthermore, the report (7) recommends  
87 periodic needs assessment and evaluation of resource need such as workforce, institutional and  
88 research capacity to address the non-communicable diseases. The eight key indicators include a  
89 comprehensive range of health services provided to the target population, the services should be  
90 directly and permanently accessible without barriers of entry, they should adequately cover the  
91 defined target population and provide continuity of care across the network of services, health  
92 conditions, levels of care, and over the life cycle. The quality of these services should be high as  
93 evidenced by their effectiveness and safety as well as being organized around the person and not  
94 the disease or the financing mechanism. They should be properly coordinated at the local level

95 and across the different types of providers, types of care and levels of service delivery with  
96 adequate accountability and efficiency (7).

97 In Kenya, the healthcare service delivery system is stratified into four tiers as (9): Tier 1  
98 (Community Health Services), Tier 2 (primary healthcare facilities such as dispensaries and  
99 health centers), Tier 3 (secondary referral facilities such as sub county and county hospitals) and  
100 Tier 4 (Tertiary facilities such as national referral hospitals). The primary care for cancer  
101 involves prevention of risk factors and screening, enhancing health promotion through public  
102 awareness, social mobilization and community engagement which are carried out in all the four  
103 tiers of healthcare service provision. Specifically, screening services begin from dispensaries and  
104 health centers towards higher tier facilities (10). On the hand, cancer diagnosis and treatment is  
105 predominantly offered in secondary and tertiary referral facilities (10). According Kenya's  
106 National Cancer Policy for 2019-2030, it is argued that nearly half (40%) of the cancers can be  
107 prevented by mitigating the risk factors and implementing already established evidence-based  
108 prevention strategies (9). The common risk factors include being overweight or obese (27.9%),  
109 inadequate consumption of fruits and vegetables (94%), tobacco and alcohol use among 13.3%  
110 and 19.3% of the newly diagnosed individuals respectively (9). It is estimated that many women  
111 harbor human papilloma virus (HPV) types 16 (9.1%) and 18 (63.1%) strains that is attributed to  
112 invasive cervical cancer (11). However, it has been previously reported that there is a low  
113 awareness of cancer and its risk factors in Kenya (12) both in the general population and among  
114 health care service providers (13,14). There are also gaps in the implementation of some of the  
115 policies and guidelines for prevention of cancer. This necessitates a local study to determine  
116 healthcare workers knowledge on screening, diagnosis and treatment of breast and cervical  
117 cancer.

118 The Kenya Government set medium term plans for the implementation of vision 2030. The  
119 current third medium-term plan (2018-2022) set the universal healthcare coverage (UHC) policy  
120 to ensure the provision of high quality and affordable healthcare for all its citizens (15). To  
121 achieve this, the government noted an insufficiency of medical equipment in both county and  
122 national hospitals. The government rolled-out the managed equipment scheme (MES) as a  
123 private-public partnership (PPP) between the government and private medical equipment service  
124 providers (16). For the diagnosis and management of cancer, the government supplied medical  
125 imaging equipment such as X-rays, Ultrasounds, CT-Scans and MRI machines (9). Although this  
126 project was noble, it was noted that the managed equipment scheme was not properly  
127 implemented due to inadequate personnel (17) to operate them and the backbone supporting  
128 infrastructure such as availability of electricity (16). Because of this challenge, this study aimed  
129 to assess the preparedness of health care facilities in provision of Breast and Cervical Cancer  
130 services in Trans Nzoia and Busia Counties in Kenya. It established the level of healthcare  
131 workers knowledge on the screening, diagnosis and treatment of breast and cervical cancers as  
132 well the availability of medical equipment and supplies for screening, diagnosis and management  
133 of the two diseases in selected two counties of Western Kenya.

134

### **Methods**

135 This cross-sectional study was conducted in Busia and Trans Nzoia counties in Western Kenya,  
136 whose breast and cervical cancer oncology programmes are supported by the Academic Model  
137 Providing Access To Healthcare – AMPATH (18,19). Trans Nzoia County is in the former Rift  
138 Valley Province of Kenya. The county borders Bungoma to the west, Uasin Gishu and  
139 Kakamega to the south, Elgeyo Marakwet to the east and the republic of Uganda to the  
140 Northwest. Trans Nzoia covers an area of 2495.5 Km<sup>2</sup> with a population of 956,559 of whom

141 49.7% are male. Approximately 50% of Trans-Nzoia population is aged 18 to 64 years and 2.8%  
142 aged above 65 years. The life expectancy in this County is 60.5years which is lower than the  
143 national average at 63.4 years. Trans-Nzoia County has a high poverty rate of 50.1%. Trans  
144 Nzoia County has 198 community units served by 38 dispensaries, 8 health centers, 6 sub-  
145 County health facilities and 1 County level hospital a total 53. Busia County borders Kakamega  
146 county to the east, Bungoma to the north, Lake Victoria and Siaya county to the South and  
147 Uganda to the west. It is 1628.4 Kilometer Squared (Km<sup>2</sup>) with a population of 953,337 people  
148 of whom 52% are above 18 years, and 47.8% are males. Life expectancy is low at 47years.  
149 Poverty levels are high at 64.2% compared to the national levels at 45.9%. Busia has 184  
150 community units served by 65 healthcare facilities namely: 47 dispensaries, 12 health centers, 5  
151 sub-county and 1 County hospital. The two counties have been reported to have a significantly  
152 high prevalence of breast and cervical cancer.

153 The study adopted service provision assessment (SPA) survey technique to assess the healthcare  
154 providers level of knowledge on breast and cervical cancer as well as determine the availability  
155 of medical equipment as per the WHO priority list between September to December 2018. An  
156 interviewer assisted questionnaire was used to collect socio-demographic, knowledge of breast  
157 and cervical cancer risk factors, screening strategies, symptoms, diagnosis and treatment of the  
158 disease among the healthcare workers enrolled. A structured facility questionnaire was used to  
159 explore the selected institutions' preparedness to screen, diagnose and treat breast and cervical  
160 cancer. Specifically, the facility questionnaire assessed level of care provided and availability of  
161 specific equipment as per the WHO priority list. Data collection was done by trained research  
162 assistants who administered questionnaires which had been pre-programmed into the Research  
163 Electronic Data capture (REDCap) database as well as a mobile application which allowed for

164 direct data entry, daily cleaning and validation by the team. Healthcare workers responses from  
165 the questionnaire were scored to assess knowledge on breast and cervical cancer and weighted  
166 means computed with their corresponding standard deviations. Descriptive statistical analysis of  
167 frequency with corresponding proportions were used to compare the availability of medical  
168 equipment in the two counties under review. All analysis were computed using standard  
169 statistical (STATA) version 15. This study received ethical approval from the Institutional  
170 Research and Ethics Committee (IREC) of MTRH/Moi University (approval number 0002090).  
171 This was followed by a research permit from the National Commission for Science technology  
172 and Innovation (NACOSTI) of Kenya (approval number NACOSTI/P/18/74238/24329) and the  
173 two County Health Management Teams (CHMTs). A written informed consent was obtained  
174 from all healthcare workers prior to enrollment. Data confidentiality was ensured by  
175 deidentifying participants responses while privacy was enhanced through used of password  
176 protected database and limited access to the datasets.

## 177 **Results**

### 178 **Healthcare workers' knowledge on breast and cervical cancer**

179 This study enrolled 73 healthcare service providers in two counties (Busia and Trans Nzoia) in  
180 Western Kenya. They were stratified based on the level of training as either clinical officers  
181 (m=29), nurses (n=37), medical officers or consultants (n=7) and assessed on their knowledge of  
182 risk factors, symptoms, screening, diagnosis and treatment of breast and cervical cancer. The  
183 mean number of correct answers were scored based on the probable total correct responses.

184 On Breast cancer there were varying responses on the probable risk factors for breast cancer.  
185 Most clinical officers thought that a history of alcohol consumption was a major risk factor  
186 followed by using contraceptive pills. On the other hand, most of the nurses also thought that



187 alcohol consumption and having a first child at an older age were the major risk factors for breast  
188 cancer. Similarly, more than half of medical officers and consulting clinicians considered alcohol  
189 consumption as a risk factor for breast cancer. All the healthcare workers enrolled described  
190 mastectomy alone as the treatment for breast cancer. There were higher levels of knowledge on  
191 breast cancer risk factors and screening among medical officers or consultant physicians  
192 compared to clinical officers and nurses. However, nurses appeared to have a higher mean  
193 knowledge score on the symptoms for breast cancer.

194 Regarding cervical cancer, the overall mean knowledge score was highest among medical  
195 officers or consultant and lowest among nurses across all domains assessed namely: risk factors,  
196 screening, diagnosis and treatment) Notably nurses had more knowledge on symptoms of both  
197 cervical and breast cancers compared to other cadres (Table 1).

### 198 **Medical equipment distribution**

199 During the initial baseline survey conducted in both counties (Busia and Trans Nzoia), it was  
200 noted that Busia county only had 6 ultrasound machines available for breast cancer screening and  
201 with half of them (3) in sub-county hospitals, one in a health center while the county referral  
202 hospital had two available. It was striking that 35 (87.5%) of the 40 healthcare facilities in the  
203 county did not have a single ultrasound machine. Furthermore, x-ray equipment that would  
204 support in further screening was only available in 5 (12.5%) healthcare facilities within Busia  
205 County, with the county hospital and one-subcounty having two x-ray equipment each. For  
206 cervical cancer screening, speculum availability was nearly evenly distributed in the healthcare  
207 facilities in Busia County with 25% (n=10) of the facilities having between 6-10 speculums  
208 while 22.5% (n=9) having more than 21. Gynecological beds were only available in 12 (30%) of  
209 all the healthcare facilities assessed in Busia county with most of the gynecological beds being

210 concentrated in County and sub-County hospitals. No public healthcare facility in Busia county  
211 had a biopsy needle for cervical cancer diagnosis while sterilization equipment were found in  
212 90% of all the public healthcare facilities. There were seven (17.5%) had cryotherapy equipment  
213 available in the public healthcare facilities in Busia County, however nearly all (97.5%) of the  
214 healthcare facilities did not have a LEEP equipment for the management of cervical lesions with  
215 the only available ones (n=2) being in Busia County referral hospital (Table 2).

216 In Trans Nzoia County, there were 7 ultrasound machines serving 33 public healthcare facilities  
217 within the county for the screening of breast cancer. There was only one out of the six sub-  
218 county hospitals with an ultrasound machine, while 2 of the 15 health centers had 2 ultrasound  
219 machines each and the county referral hospital equally had 2 machines. This study noted that  
220 there were 9 x-ray machines that could support in cancer screening within Trans Nzoia county  
221 where a county and sub-county hospital having 2 each while a health center having three x-ray  
222 machines. Most (36.4%; n=12) of the facilities assessed had a 1-5 speculum for cervical cancer  
223 screening followed by those with 6-10 speculum in 11 (33.3%) facilities. However, a single  
224 dispensary did not have any speculum. Public healthcare facilities in Trans Nzoia county had 44  
225 gynecological beds distributed among 27 of the 33 facilities with most of the gynecological beds  
226 being concentrated in County (4) and sub-County (12) hospitals. Similar to Busia County, no  
227 public healthcare facility in Trans Nzoia county had a biopsy needle for cervical cancer  
228 diagnosis. However, only 4 (12.1%) of the facilities surveyed in Trans Nzoia county lacked a  
229 sterilization equipment. There were 13 (39.4%) cryotherapy equipment available in the public  
230 healthcare facilities within Trans Nzoia County, where majority (8) of these were in health  
231 centers. This study reports the availability of a single LEEP equipment stationed at a health  
232 center in Trans Nzoia county (Table 3).

233  
234  
235  
236  
237  
238  
239  
240  
241  
242  
243  
244  
245  
246  
247  
248  
249  
250  
251  
252  
253  
254  
255

## Discussion

### **Knowledge on breast and cervical cancer**

In this study there was a low level of knowledge among health care providers on the risk factors, symptoms, screening, diagnosis and treatment of both breast and cervical cancer. This finding is consistent with a previous study conducted in Kenya (20) which found low level of knowledge among healthcare workers on breast and cervical cancer. This finding was across various cadres and level of training of the healthcare workers. This low level of knowledge could directly influence the kind of care patients with both cancers could receive in public healthcare facilities located in the devolved governance units of Kenya. In a community study conducted in the coastal region of Kenya (12), the key barriers affecting access breast cancer care were lack of awareness on breast and cervical cancer risk factors, signs and symptoms among the community members enrolled. In addition to stigma towards patients seeking cervical cancer treatment and the overall negative attitudes towards patients with cancer, cultural beliefs and personal discomfort were some of the other reasons for given low access to cancer care. Among the health care workers who were interviewed, it was noted that they too had limited knowledge on breast cancer (12). The Kenya Cancer Policy of 2019 to 2030 further acknowledges that there exist a knowledge-gap in the level of knowledge on various forms of cancer among human resources for health (9). The Ministry of Health in Kenya has instituted various mechanisms to train more healthcare workers on by conducting capacity building activities and mentorship to primary care providers in counties by coordinating specialist outreach programs in collaboration with tertiary facilities. Furthermore, Kenya has initiated diploma, masters and oncology fellowship programs in addition to ongoing pre-service and in service training for primary care workers to strengthen cancer care service delivery (9,10).

256 Low levels on knowledge in cancer are not limited to healthcare workers practicing in public  
257 hospitals in Kenya. In Rwanda (21), it was reported that cancer care is mainly offered by  
258 physicians who work in collaboration with colleagues in USA and Canada through virtual tumor  
259 boards. The authors (21) further noted that in Rwanda, there are gaps in prevention and early  
260 detection of breast and cervical cancer despite introduction of mitigation measures such as breast  
261 surgery fellowship at the national military hospital.

## 262 **Medical Equipment**

263 This study based its assessment on the availability and distribution of medical equipment for the  
264 management of cancer on the World Health Organization's priority list of medical devices for  
265 cancer management of 2017 (22). This priority list provides an implementation reference to be  
266 adopted based on the needs of the healthcare system in the specific country and serves as a  
267 standard by which we can assess preparedness to provide cancer care. The guideline stipulates  
268 the minimum requirements for prevention, diagnosis, treatment, follow up and palliative care for  
269 all cancers. For breast cancer prevention, physical examination through bimanual palpation of  
270 breasts and locoregional lymph nodes as well as mammography is recommended in low resource  
271 healthcare settings, while an MRI breast may be used in combination with mammography in  
272 certain high-risk patients. Among the 73 facilities assessed, none of them had a mammogram or  
273 MRI to support breast cancer screening. This is because most of these facilities are available in  
274 national teaching hospitals as well as a few tier – four hospitals in some counties in Kenya. This  
275 finding is consistent to that reported in Rwanda (21) where MRI machines were available in one  
276 national public and one private hospital. The diagnosis of breast cancer involves thorough  
277 bimanual palpation of the breasts and locoregional nodes, blood testing that includes complete  
278 blood count and blood chemistries (liver and renal function tests, alkaline phosphatase and

279 calcium), breast imaging initially bilateral mammography followed by an ultrasound of the  
280 breast and locoregional nodes. Following imaging, an ultrasound-guided core needle biopsy, a  
281 stereo-static guided or manual biopsy sampling is done for histopathological diagnosis and  
282 biomarker analysis of the sample. In the facilities assessed in this study, ultrasound services were  
283 available in 5 of the 40 public healthcare facilities in Busia County while in Trans Nzoia only 4  
284 out of the 33 facilities in the county. However, none of these counties reported having biopsy  
285 needles to support ultrasound-guided core needle biopsy for breast cancer diagnosis. This is  
286 because only a few county hospitals in Kenya have the capacity to offer histopathology services  
287 contributing to diagnostic delays (9). Computerized tomography scanning of the chest as well as  
288 a chest x-Ray in low resource settings could be used in the staging of breast cancer. In this study,  
289 x-ray services were not available in many facilities in both Trans Nzoia and Busia counties with  
290 only 9 and 5 machines available respectively. The current cancer Policy in Kenya (9) highlights  
291 that a major challenge in the adequate distribution of diagnostic equipment to healthcare  
292 institutions in Kenya is a mismatch between human resource capacity to operationalize the  
293 equipment and supplies. Furthermore, the policy notes a lack of clear policy guideline on  
294 distribution, placement, monitoring and evaluation of medical equipment. That is why this study  
295 noted a lack of consistency in the distribution of ultrasound and x-ray machines across the  
296 various tiers of the healthcare facilities in the counties reviewed. All these equipment availability  
297 challenges in both counties could be a major contributor to the late diagnosis of breast cancer  
298 currently being witnessed in Kenya (2,9,10).

299 The current cervical cancer screening and prevention strategies (11,23) involve preventive  
300 immunization against human papilloma virus (HPV) for girls, screening of pre-cancerous lesions  
301 using a speculum or vaginal examinations and inspection with acetic acid (VIA), conducting of a

302 HPV test and treating of pre-cancerous lesions using cryotherapy and large loop excision of  
303 transformation (LEEP). In this study, most facilities assessed in Trans Nzoia had a minimum of  
304 1-5 speculums to support screening and a single gynecological bed available, however only a  
305 single sub-county facility had LEEP and a cryotherapy equipment. In Busia county, most  
306 facilities had 11-15 specula available, with two LEEP equipment in the county hospital and five  
307 cryotherapy equipment. A biopsy needle is needed in the definitive diagnosis of  
308 invasive cervical cancer in the second care level (22). However, no facility in both counties had  
309 a core biopsy needle. An abdominal ultrasound is often used in the staging of cervical cancer as  
310 well as chest x-ray. However, there were limited ultrasound and x-ray facilities in the studies  
311 sampled.

### 312 **Conclusions and Recommendations**

313 A below average level of knowledge on breast and cervical cancer among the healthcare workers  
314 attending to patients in public healthcare facilities was found in both Busia and Trans Nzoia  
315 counties. Furthermore, there was a disparity in the distribution and quantity of priority medical  
316 equipment for the screening, diagnosis and treatment of breast and cervical cancer in the two  
317 county hospitals. From the findings of this study, there is need for targeted in-service training  
318 among nurses on breast and cervical cancer risk factors and screening modalities as they are the  
319 first contacts with suspected cancer patients and are also involved patient medical education.  
320 Advanced cancer diagnostic equipment such as core-biopsy needles and mammograms should be  
321 provided in these public healthcare facilities to support breast and cervical cancer staging and  
322 risk assessment. Specialized training of healthcare workers is needed to reduce the mismatch  
323 between human resource capacity to operationalize the medical equipment and their supply.

324 Finally, there is need for proper guidelines to guide the distribution of medical equipment by  
325 facilities level of care and human resource availability.

## 326 **REFERENCES**

- 327 1. IARC. Global Cancer Observatory [Internet]. World Health Organization. 2021 [cited  
328 2021 May 11]. Available from: <https://gco.iarc.fr/>
- 329 2. Globocan. Kenya Cancer Report. 2020.
- 330 3. Tiruneh FN, Chuang KY, Ntenda PAM, Chuang YC. Individual-level and community-  
331 level determinants of cervical cancer screening among Kenyan women: A multilevel  
332 analysis of a Nationwide survey. BMC Womens Health [Internet]. 2017 Nov 15 [cited  
333 2021 May 3];17(1):1–14. Available from:  
334 <https://link.springer.com/articles/10.1186/s12905-017-0469-9>
- 335 4. de Sanjose S, Tsu VD. Prevention of cervical and breast cancer mortality in low-and  
336 middle-income countries: A window of opportunity. Int J Womens Health. 2019;11:381–  
337 6.
- 338 5. Kangethe JM, Gachuno OW, Komu JG, Mutai KK, Lwembe RM. Reasons for Low  
339 Uptake of Cervical Cancer Preventive Services in Kenya and other Low-Middle Income  
340 Countries: A Review Article. 2018;06.
- 341 6. USAID. The DHS Program - Service Provision Assessments (SPA) [Internet]. 2021 [cited  
342 2021 May 12]. Available from: [https://dhsprogram.com/methodology/Survey-](https://dhsprogram.com/methodology/Survey-Types/SPA.cfm)  
343 [Types/SPA.cfm](https://dhsprogram.com/methodology/Survey-Types/SPA.cfm)
- 344 7. WHO. Global action plan for the prevention and control of noncommunicable diseases

- 345 2013-2020. Geneva; 2013.
- 346 8. UNASD. Transforming our World: The 2030 Agenda for sustainable development. United  
347 Nations Agenda for Sustainable Development. 2016.
- 348 9. MOH-Kenya. Kenya Cancer Policy 2019-2030. Nairobi; 2019.
- 349 10. MOH-Kenya. Kenya National Cancer Screening Guidelines [Internet]. Ministry of Health  
350 - Cancer Care Guidelines. 2018. Available from: [www.health.go.ke](http://www.health.go.ke)
- 351 11. ICO/IARC. Human Papillomavirus and Related Cancers - Fact Sheet 2018 (Kenya)  
352 [Internet]. 2019 [cited 2021 May 12]. Available from: [www.hpvcentre.net](http://www.hpvcentre.net)
- 353 12. Sayed S, Ngugi AK, Mahoney MR, Kurji J, Talib ZM, MacFarlane SB, et al. Breast  
354 Cancer knowledge, perceptions and practices in a rural Community in Coastal Kenya.  
355 BMC Public Health [Internet]. 2019 Feb 12 [cited 2021 May 12];19(1):1–13. Available  
356 from: <https://doi.org/10.1186/s12889-019-6464-3>
- 357 13. Makau-Barasa LK, Greene SB, Othieno-Abinya NA, Wheeler S, Skinner A, Bennett A V.  
358 Improving access to cancer testing and treatment in Kenya. *J Glob Oncol*. 2017;4:1–8.
- 359 14. Njuguna F, Martijn H, Langat S, Musimbi J, Muliro H, Skiles J, et al. Factors influencing  
360 time to diagnosis and treatment among pediatric oncology patients in Kenya. *Pediatr*  
361 *Hematol Oncol* [Internet]. 2016 [cited 2021 May 12];33(3):186–99. Available from:  
362 <https://doi.org/10.3109/08880018.2016.1169566>
- 363 15. GOK. Kenya Vision 2030: Third Medium Term Plan (2018-2022). Transforming Lives□:  
364 Advancing socio-economic development through the “Big Four.” 2018.



- 365 16. Mutua J, Wamalwa N. Leasing of Medical Equipment Project in Kenya: Value for Money  
366 Assessment [Internet]. 2020. Available from:  
367 [https://www.africaportal.org/publications/leasing-medical-equipment-project-kenya-](https://www.africaportal.org/publications/leasing-medical-equipment-project-kenya-value-money-assessment/)  
368 [value-money-assessment/](https://www.africaportal.org/publications/leasing-medical-equipment-project-kenya-value-money-assessment/)
- 369 17. Atieno OM, Opanga S, Martin A, Kurdi A, Godman B. Pilot study assessing the direct  
370 medical cost of treating patients with cancer in Kenya; findings and implications for the  
371 future. *J Med Econ* [Internet]. 2018;21(9):878–87. Available from:  
372 <https://doi.org/10.1080/13696998.2018.1484372>
- 373 18. Strother RM, Asirwa FC, Busakhala NB, Njiru E, Orang’o E, Njuguna F, et al. The  
374 evolution of comprehensive cancer care in Western Kenya. *J Cancer Policy* [Internet].  
375 2013;1(1–2):e25–30. Available from: <http://dx.doi.org/10.1016/j.jcpo.2013.04.001>
- 376 19. Rosen B, Itsura P, Tonui P, Covens A, van Lonkhuijzen L, Orang’o EO. Development of  
377 a comprehensive and sustainable gynecologic oncology training program in western  
378 Kenya, a low resource setting. *Gynecol Oncol Reports* [Internet]. 2017;21(June):122–7.  
379 Available from: <http://dx.doi.org/10.1016/j.gore.2017.06.014>
- 380 20. Makau-Barasa LK, Greene SB, Othieno-Abinya NA, Wheeler S, Skinner A, Bennett A V.  
381 Improving access to cancer testing and treatment in Kenya. *J Glob Oncol*. 2018 Aug  
382 4;2018(4).
- 383 21. Rubagumya F, Costas-Chavarri A, Manirakiza A, Murenzi G, Uwinkindi F, Ntizimira C,  
384 et al. State of Cancer Control in Rwanda: Past, Present, and Future Opportunities. *JCO*  
385 *Glob Oncol*. 2020;(6):1171–7.

386 22. World Health Organization (WHO). WHO list of priority medical devices for cancer  
 387 management. Geneva: World Health Organization; 2017. [Internet]. Vol. 18, WHO press.  
 388 2017. 856 p. Available from:  
 389 [https://apps.who.int/iris/bitstream/handle/10665/255262/9789241565462-](https://apps.who.int/iris/bitstream/handle/10665/255262/9789241565462-eng.pdf?sequence=1)  
 390 [eng.pdf?sequence=1](https://apps.who.int/iris/bitstream/handle/10665/255262/9789241565462-eng.pdf?sequence=1)

391 23. Khozaim K, Orang’O E, Christoffersen-Deb A, Itsura P, Oguda J, Muliro H, et al.  
 392 Successes and challenges of establishing a cervical cancer screening and treatment  
 393 program in western Kenya. Int J Gynecol Obstet [Internet]. 2014;124(1):12–8. Available  
 394 from: <http://dx.doi.org/10.1016/j.ijgo.2013.06.035>

395 **Table 1: Level of Provider Knowledge**

| Knowledge Indicators | Mean score Knowledge on breast cancer |                              |                |                | Mean score Knowledge on cervical cancer |                              |                |                |
|----------------------|---------------------------------------|------------------------------|----------------|----------------|-----------------------------------------|------------------------------|----------------|----------------|
|                      | Provider Training level               |                              |                | Expected Score | Provider Training level                 |                              |                | Expected Score |
|                      | CO<br>N= 29                           | Medic/<br>Consultant<br>N =7 | Nurse<br>N= 37 |                | CO<br>N= 29                             | Medic/<br>Consultant<br>N =7 | Nurse<br>N= 37 |                |
| <b>Risk Factors</b>  | 3.48(1.81)                            | 3.71(1.89)                   | 2.27(1.35)     | <b>11</b>      | 3.79(1.29)                              | 4(1))                        | 1.05(1.05)     | <b>10</b>      |
| <b>Symptoms</b>      | 1.57(1.57)                            | 1.5(1.5)                     | 1.74(1.74)     | <b>10</b>      | 1.25(1.25)                              | 1.35(1.35)                   | 2.65(0.79)     | <b>7</b>       |
| <b>Screening</b>     | 2.62(0.86)                            | 2.71(0.95)                   | 1.97(0.76)     | <b>4</b>       | 2.93(0.84)                              | 3(0.58)                      | 0.89(0.61)     | <b>4</b>       |
| <b>Diagnosis</b>     | 0.93(0.53)                            | 0.86(0.69)                   | 0.51(0.56))    | <b>2</b>       | 1.07(0.53)                              | 1.71(0.76)                   | 1.05(1.05)     | <b>3</b>       |
| <b>Treatment</b>     | 1                                     | 1                            | 1              | <b>6</b>       | 2.72(1.03)                              | 3.29(0.95)                   | 2.46(0.96)     | <b>8</b>       |

397 **Table 2: Medical equipment availability by healthcare facility's level of care in Busia County**

| Variable name                  | Value    | Total<br>(N=40) | Sub County<br>n=7 (18%) | Health Centre<br>n=10 (25%) | Dispensary<br>n=22 (55%) | County Referral<br>n=1 (2%) |
|--------------------------------|----------|-----------------|-------------------------|-----------------------------|--------------------------|-----------------------------|
| <b>Ultrasounds machines</b>    |          |                 |                         |                             |                          |                             |
|                                | 0        | 35 (87.5%)      | 4 (57.1%)               | 9 (90%)                     | 22 (100%)                | 0 (0%)                      |
|                                | 1        | 4 (10%)         | 3 (42.9%)               | 1 (10%)                     | 0 (0%)                   | 0 (0%)                      |
|                                | 2        | 1 (2.5%)        | 0 (0%)                  | 0 (0%)                      | 0 (0%)                   | 1 (100%)                    |
| <b>X-ray machine</b>           |          |                 |                         |                             |                          |                             |
|                                | 0        | 35 (87.5%)      | 3 (42.9%)               | 10 (100%)                   | 22 (100%)                | 0 (0%)                      |
|                                | 1        | 3 (7.5%)        | 3 (42.9%)               | 0 (0%)                      | 0 (0%)                   | 0 (0%)                      |
| <b>Speculum available</b>      |          |                 |                         |                             |                          |                             |
|                                | 0        | 1 (2.5%)        | 0 (0%)                  | 0 (0%)                      | 1 (4.5%)                 | 0 (0%)                      |
|                                | 1-5      | 10 (25%)        | 0 (0%)                  | 2 (20%)                     | 8 (36.4%)                | 0 (0%)                      |
|                                | 6-10     | 10 (25%)        | 1 (14.3%)               | 2 (20%)                     | 7 (31.8%)                | 0 (0%)                      |
|                                | 11-15    | 7 (17.5%)       | 4 (57.1%)               | 2 (20%)                     | 1 (4.5%)                 | 0 (0%)                      |
|                                | 16-20    | 3 (7.5%)        | 1 (14.3%)               | 0 (0%)                      | 1 (4.5%)                 | 1 (100%)                    |
|                                | Above 21 | 9 (22.5%)       | 1 (14.3%)               | 4 (40%)                     | 4 (18.2%)                | 0 (0%)                      |
| <b>Gynecological beds</b>      |          |                 |                         |                             |                          |                             |
|                                | 0        | 28 (70%)        | 4 (57.1%)               | 6 (60%)                     | 18 (81.8%)               | 0 (0%)                      |
|                                | 1        | 6 (15%)         | 0 (0%)                  | 3 (30%)                     | 3 (13.6%)                | 0 (0%)                      |
|                                | 2        | 6 (15%)         | 3 (42.9%)               | 1 (10%)                     | 1 (4.5%)                 | 1 (100%)                    |
| <b>Biopsy needles</b>          |          |                 |                         |                             |                          |                             |
|                                | 0        | 40 (100%)       | 7 (100%)                | 10 (100%)                   | 22 (100%)                | 1 (100%)                    |
| <b>Sterilization Equipment</b> |          |                 |                         |                             |                          |                             |
|                                | 0        | 4 (10%)         | 0 (0%)                  | 0 (0%)                      | 4 (18.2%)                | 0 (0%)                      |
|                                | 1        | 23 (57.5%)      | 3 (42.9%)               | 6 (60%)                     | 14 (63.6%)               | 0 (0%)                      |
|                                | 2        | 10 (25%)        | 3 (42.9%)               | 4 (40%)                     | 2 (9.1%)                 | 1 (100%)                    |
|                                | 3        | 2 (5%)          | 0 (0%)                  | 0 (0%)                      | 2 (9.1%)                 | 0 (0%)                      |
|                                | 4        | 1 (2.5%)        | 1 (14.3%)               | 0 (0%)                      | 0 (0%)                   | 0 (0%)                      |
| <b>Cryotherapy equipment</b>   |          |                 |                         |                             |                          |                             |
|                                | 0        | 33 (82.5%)      | 5 (71.4%)               | 9 (90%)                     | 19 (86.4%)               | 0 (0%)                      |
|                                | 1        | 6 (15%)         | 2 (28.6%)               | 1 (10%)                     | 3 (13.6%)                | 0 (0%)                      |
|                                | 4        | 1 (2.5%)        | 0 (0%)                  | 0 (0%)                      | 0 (0%)                   | 1 (100%)                    |
| <b>LEEP equipment</b>          |          |                 |                         |                             |                          |                             |
|                                | 0        | 39 (97.5%)      | 7 (100%)                | 10 (100%)                   | 22 (100%)                | 0 (0%)                      |
|                                | 2        | 1 (2.5%)        | 0 (0%)                  | 0 (0%)                      | 0 (0%)                   | 1 (100%)                    |

398

399

400 **Table 3: Medical equipment availability by healthcare facility's level of care in Trans Nzoia**  
 401 **County**

| Variable name                  | Value | Total<br>(N=40) | Sub County<br>n=7 (18%) | Health Centre<br>n=10 (25%) | Dispensary<br>n=22 (55%) | County Referral<br>n=1 (2%) |
|--------------------------------|-------|-----------------|-------------------------|-----------------------------|--------------------------|-----------------------------|
| <b>Ultrasounds machines</b>    |       |                 |                         |                             |                          |                             |
|                                | 0     | 29 (87.9%)      | 5 (83.3%)               | 13 (86.7%)                  | 11 (100%)                | 0 (0%)                      |
|                                | 1     | 1 (3%)          | 1 (16.7%)               | 0 (0%)                      | 0 (0%)                   | 0 (0%)                      |
|                                | 2     | 3 (9.1%)        | 0 (0%)                  | 2 (13.3%)                   | 0 (0%)                   | 1 (100%)                    |
| <b>X-ray machine</b>           |       |                 |                         |                             |                          |                             |
|                                | 0     | 28 (84.8%)      | 4 (66.7%)               | 14 (93.3%)                  | 10 (90.9%)               | 0 (0%)                      |
|                                | 1     | 2 (6.1%)        | 1 (16.7%)               | 1 (6.7%)                    | 0 (0%)                   | 0 (0%)                      |
|                                | 2     | 2 (6.1%)        | 1 (16.7%)               | 0 (0%)                      | 0 (0%)                   | 1 (100%)                    |
|                                | 3     | 1 (3%)          | 0 (0%)                  | 0 (0%)                      | 1 (9.1%)                 | 0 (0%)                      |
| <b>Speculum available</b>      |       |                 |                         |                             |                          |                             |
|                                | 0     | 1 (3%)          | 0 (0%)                  | 0 (0%)                      | 1 (9.1%)                 | 0 (0%)                      |
|                                | 1-5   | 12 (36.4%)      | 0 (0%)                  | 5 (33.3%)                   | 7 (63.6%)                | 0 (0%)                      |
|                                | 11-15 | 4 (12.1%)       | 1 (16.7%)               | 3 (20%)                     | 0 (0%)                   | 0 (0%)                      |
|                                | 16-20 | 2 (6.1%)        | 0 (0%)                  | 1 (6.7%)                    | 1 (9.1%)                 | 0 (0%)                      |
|                                | 6-10  | 11 (33.3%)      | 3 (50%)                 | 6 (40%)                     | 2 (18.2%)                | 0 (0%)                      |
|                                | > 21  | 3 (9.1%)        | 2 (33.3%)               | 0 (0%)                      | 0 (0%)                   | 1 (100%)                    |
| <b>Gynecological beds</b>      |       |                 |                         |                             |                          |                             |
|                                | 0     | 6 (18.2%)       | 0 (0%)                  | 1 (6.7%)                    | 5 (45.5%)                | 0 (0%)                      |
|                                | 1     | 14 (42.4%)      | 2 (33.3%)               | 8 (53.3%)                   | 4 (36.4%)                | 0 (0%)                      |
|                                | 2     | 11 (33.3%)      | 3 (50%)                 | 6 (40%)                     | 2 (18.2%)                | 0 (0%)                      |
|                                | 4     | 2 (6.1%)        | 1 (16.7%)               | 0 (0%)                      | 0 (0%)                   | 1 (100%)                    |
| <b>Biopsy needles</b>          |       |                 |                         |                             |                          |                             |
|                                | 0     | 33 (100%)       | 6 (100%)                | 15 (100%)                   | 11 (100%)                | 1 (100%)                    |
| <b>Sterilization Equipment</b> |       |                 |                         |                             |                          |                             |
|                                | 0     | 4 (12.1%)       | 0 (0%)                  | 0 (0%)                      | 4 (36.4%)                | 0 (0%)                      |
|                                | 1     | 20 (60.6%)      | 5 (83.3%)               | 10 (66.7%)                  | 5 (45.5%)                | 0 (0%)                      |
|                                | 2     | 6 (18.2%)       | 1 (16.7%)               | 3 (20%)                     | 2 (18.2%)                | 0 (0%)                      |
|                                | 3     | 2 (6.1%)        | 0 (0%)                  | 2 (13.3%)                   | 0 (0%)                   | 0 (0%)                      |
|                                | 5     | 1 (3%)          | 0 (0%)                  | 0 (0%)                      | 0 (0%)                   | 1 (100%)                    |
| <b>Cryotherapy equipment</b>   |       |                 |                         |                             |                          |                             |
|                                | 0     | 20 (60.6%)      | 4 (66.7%)               | 7 (46.7%)                   | 9 (81.8%)                | 0 (0%)                      |
|                                | 1     | 13 (39.4%)      | 2 (33.3%)               | 8 (53.3%)                   | 2 (18.2%)                | 1 (100%)                    |
| <b>LEEP equipment</b>          |       |                 |                         |                             |                          |                             |
|                                | 0     | 32 (97%)        | 6 (100%)                | 14 (93.3%)                  | 11 (100%)                | 1 (100%)                    |
|                                | 1     | 1 (3%)          | 0 (0%)                  | 1 (6.7%)                    | 0 (0%)                   | 0 (0%)                      |

403

### **Acknowledgements**

404 This research was supported with funds from Access Accelerated and by cooperative agreement  
405 between World Bank and Ministry of Health Kenya NCDs Division. The management of Moi  
406 Teaching and Referral Hospital (MTRH), Moi University and the Counties of Busia and Trans  
407 Nzoia for an implementation agreement that enabled the data collection in the selected public  
408 hospitals. We further acknowledge the study participants as well as AMPATH for providing  
409 technical support for this study.
